# Supplementary material for: Cyclocytidine hydrochloride inhibits the synthesis of relaxed circular DNA of hepatitis B virus
Source: PeerJ. 2022 Jul 12;10:e13719. doi: 10.7717/peerj.13719 (PMC9285472; doi:10.7717/peerj.13719)
Supplement: Supplemental Information 7 [file peerj-10-13719-s007.xls]

## Sheet: Sheet1
Replicate-1
umol/L	0	5	10	20	40	80	160
1	2.059	1.043	1.189	1.264	1.028	0.852	0.268
2	2.348	0.589	1.396	1.017	1.096	0.851	0.304
3	2.121	1.283	1.16	0.871	1.172	0.754	0.328
Mean	2.176	0.971667	1.24833	1.05067	1.09867	0.819	0.3
Replicate-2									Replicate-3
umol/L	无	5	10	20	40	80	160		umol/L	0	5	10	20	40	80	160
1	2.952	2.171	1.438	1.78	1.458	0.586	0.322		1	1.561	1.506	2.547	1.015	0.744	0.553	0.49
2	1.961	1.998	1.159	1.739	1.616	0.636	0.342		2	1.042	2.183	1.862	0.839	0.751	0.636	0.786
3	1.595	1.976	1.232	1.003	0.893	0.697	0.432		3	1.24	1.436	2.067	1.186	0.728	1.148	0.928
Mean	2.16933	2.04833	1.27633	1.50733	1.32233	0.639667	0.365333		Mean	1.281	1.70833	2.15867	1.01333	0.741	0.779	0.734667
