# Supplementary material for: Cyclocytidine hydrochloride inhibits the synthesis of relaxed circular DNA of hepatitis B virus
Source: PeerJ. 2022 Jul 12;10:e13719. doi: 10.7717/peerj.13719 (PMC9285472; doi:10.7717/peerj.13719)
Supplement: Supplemental Information 8 [file peerj-10-13719-s008.xlsx]

## Sheet: Sheet1
			Replicate-1						Replicate-2						Replicate-3
		RC DNA	NS DNA	RC/NS				RC DNA	NS DNA	RC/NS				RC DNA	NS DNA	RC/NS
	DMSO	6350.58	5760.6	1.10242			DMSO	2862.45	1114.49	2.56839			DMSO	3102.05	2684.39	1.15559
	5uM	5469.43	4657.97	1.17421			5uM	4951.44	5525.73	0.896069			5uM	3692.92	1539.02	2.39952
	10uM	1437.07	2347	0.612298			10uM	5896.83	6368.1	0.925996			10uM	1697.48	2019.2	0.84067
	20uM	2607.09	4632.68	0.56276			20uM	3703.54	4121.78	0.898529			20uM	1349.48	2527.86	0.533841
