# Supplementary material for: Cyclocytidine hydrochloride inhibits the synthesis of relaxed circular DNA of hepatitis B virus
Source: PeerJ. 2022 Jul 12;10:e13719. doi: 10.7717/peerj.13719 (PMC9285472; doi:10.7717/peerj.13719)
Supplement: Supplemental Information 9 [file peerj-10-13719-s009.xls]

## Sheet: Sheet1
	2 day treament						2 day treament				2 day treament
Replicate-1					Replicate-2					Replicate-3
umol/L	DMSO	20uM	20uM/DMSO		umol/L	DMSO	20uM	20uM/DMSO		umol/L	DMSO	20uM	20uM/DMSO
1	2.159	1.604	0.742937		1	1.952	1.58	0.809426		1	1.561	1.015	0.650224
2	2.248	1.827	0.812722		2	2.161	1.65	0.763535		2	1.042	0.839	0.805182
3	2.021	1.5	0.742207		3	1.895	1.2	0.633245		3	1.24	1.186	0.956452
Mean	2.14267	1.64367	0.765955		Mean	2.00267	1.47667	0.735402		Mean	1.281	1.01333	0.803953
	4 day treament						4 day treament				4 day treament
Replicate-1					Replicate-2					Replicate-3
umol/L	DMSO	20uM	20uM/DMSO		umol/L	DMSO	20uM	20uM/DMSO		umol/L	DMSO	20uM	20uM/DMSO
1	2.059	1.264	0.61389		1	2.952	1.38	0.46748		1	1.261	0.715	0.56701
2	2.348	1.017	0.433135		2	1.961	0.739	0.376849		2	1.012	0.439	0.433794
3	2.121	0.871	0.410655		3	1.595	0.803	0.503448		3	1.14	0.786	0.689474
Mean	2.176	1.05067	0.485893		Mean	2.16933	0.974	0.449259		Mean	1.13767	0.646667	0.563426
