# Supplementary material for: Cyclocytidine hydrochloride inhibits the synthesis of relaxed circular DNA of hepatitis B virus
Source: PeerJ. 2022 Jul 12;10:e13719. doi: 10.7717/peerj.13719 (PMC9285472; doi:10.7717/peerj.13719)
Supplement: Supplemental Information 10 [file peerj-10-13719-s010.xlsx]

## Sheet: Sheet1
	Replicate-1					Replicate-2
	DMSO	2 days	4 days			DMSO	2 days	4 days
RC	24429.5	6112.83	2453.94		RC	20441.6	5120.81	2470.54
NS	28008.3	25371.8	12704.6		NS	25010.5	26021.6	12610.3
RC/NS	0.872224	0.240931	0.193154		RC/NS	0.817321	0.196791	0.195914
