# Supplementary material for: Cyclocytidine hydrochloride inhibits the synthesis of relaxed circular DNA of hepatitis B virus
Source: PeerJ. 2022 Jul 12;10:e13719. doi: 10.7717/peerj.13719 (PMC9285472; doi:10.7717/peerj.13719)
Supplement: Supplemental Information 11 [file peerj-10-13719-s011.xlsx]

## Sheet: Sheet1
		RC DNA	NS DNA	RC/NS	Total			RC DNA	NS DNA	RC/NS	Total			RC DNA	NS DNA	RC/NS	Total
	EPR(-)	724.648	11584.8	0.0625518	12309.4		EPR(-)	675.163	4653.73	0.14508	5328.89		EPR(-)	865.477	7091.53	0.122044	7957.01
	EPR(+)	1873.64	8578.79	0.218404	10452.4		EPR(+)	1831.88	4608.3	0.397518	6440.18		EPR(+)	3308.34	10460.8	0.316262	13769.1
	EPR(+)+Cyclocytidine HCl	1199.15	10646.6	0.112632	11845.8		EPR(+)+Cyclocytidine HCl	906.083	5191.02	0.174548	6097.11		EPR(+)+Cyclocytidine HCl	862.861	15684.1	0.0550151	16546.9
